# Supplementary material for: DNA Ligases I and III Cooperate in Alternative Non-Homologous End-Joining in Vertebrates
Source: PubMed Central journal article supplement (PMC3610672; doi:10.1371/journal.pone.0059505), 2013-03-28
Supplement: pone.0059505.s005.pdf [file pone.0059505.s005.pdf]

**Table S1**

| <b>Cell line</b>                                                           | <b>Feature</b>                                                                                        |
|----------------------------------------------------------------------------|-------------------------------------------------------------------------------------------------------|
| <i>LIG1</i> <sup>-/-</sup>                                                 | <i>LIG1</i> knockout                                                                                  |
| <i>LIG3</i> <sup>-/2loxP</sup>                                             | <i>LIG3</i> conditional knockout                                                                      |
| <i>LIG3</i> <sup>-/</sup> *                                                | <i>LIG3</i> knockout                                                                                  |
| <i>LIG3</i> <sup>-/M2I</sup>                                               | nuclear <i>LIG3</i> knockout                                                                          |
| <i>LIG4</i> <sup>-/-</sup>                                                 | <i>LIG4</i> knockout                                                                                  |
| <i>LIG1</i> <sup>-/-</sup> <i>LIG4</i> <sup>-/-</sup>                      | <i>LIG1</i> knockout; <i>LIG4</i> knockout                                                            |
| <i>LIG3</i> <sup>-/2loxP</sup> <i>LIG4</i> <sup>-/-</sup>                  | <i>LIG3</i> conditional knockout; <i>LIG4</i> knockout                                                |
| <i>LIG3</i> <sup>-/</sup> <i>LIG4</i> <sup>-/</sup> *                      | <i>LIG3</i> knockout; <i>LIG4</i> knockout                                                            |
| <i>LIG3</i> <sup>-/M2I</sup> <i>LIG4</i> <sup>-/-</sup>                    | nuclear <i>LIG3</i> knockout; <i>LIG4</i> knockout                                                    |
| <i>LIG3</i> <sup>-/</sup> <i>Cdc9</i>                                      | <i>LIG3</i> knockout overexpressing <i>CDC9</i> (yeast <i>LIG1</i> )                                  |
| <i>LIG3</i> <sup>-/2loxP</sup> <i>hLIG3α</i>                               | <i>LIG3</i> conditional knockout overexpressing human nuclear <i>LIG3α</i>                            |
| <i>LIG3</i> <sup>-/</sup> <i>hLIG3α</i> *                                  | <i>LIG3</i> knockout overexpressing human nuclear <i>LIG3α</i>                                        |
| <i>LIG3</i> <sup>-/2loxP</sup> <i>LIG4</i> <sup>-/-</sup> <i>mts-hLIG1</i> | <i>LIG3</i> conditional knockout; <i>LIG4</i> knockout overexpressing human mitochondrial <i>LIG1</i> |
| <i>LIG3</i> <sup>-/</sup> <i>LIG4</i> <sup>-/-</sup> <i>mts-hLIG1</i> *    | <i>LIG3</i> knockout; <i>LIG4</i> knockout overexpressing human mitochondrial <i>LIG1</i>             |

\* Conditional allele deleted by 4HT treatment of parental cell line.
